# Supplementary material for: Breaking constraint of mammalian axial formulae
Source: PubMed Central journal article supplement (PMC8752674; doi:10.1038/s41467-021-27335-z), 2022-01-11
Supplement: 41467_2021_27335_MOESM3_ESM.pdf [file 41467_2021_27335_MOESM3_ESM.pdf]

File Name: Supplementary Movie 1

Description: Wildtype E13.5 mouse embryo, caudal region, stained for Sox2 (red), T/Brachyury (T;Bra; green) and Foxa2 (blue) proteins. 3-Disco clearing, Ultramicroscope II imaging.

File Name: Supplementary Movie 2

Description: *Gdf11*<sup>-/-</sup>;*Hoxd12*<sup>OE</sup>\_1 embryo, caudal region, stained for Sox2 (red), T/Brachyury (T;Bra; green) and Foxa2 (blue) proteins. 3-Disco clearing, Ultramicroscope II imaging.

File Name: Supplementary Movie 3

Description: *Gdf11*<sup>-/-</sup>;*Hoxd12*<sup>OE</sup>\_2 embryo, caudal region, stained for Sox2 (red), T/Brachyury (T;Bra; green) and Foxa2 (blue) proteins. 3-Disco clearing, Ultramicroscope II imaging.
